# Supplementary material for: Design of highly efficient deep-red emission in the Mn4+ doped new-type structure CaMgAl10O17 for plant growth LED light
Source: Royal Society of Chemistry journal article supplement (doi:10.1039/d1dt02088a), 2021-01-01
Supplement: d1dt02088a1.pdf [file d1dt02088a1.pdf]

## Supplementary Information for

**Design of highly efficient deep-red emission in Mn<sup>4+</sup> doped new-type structure**

**CaMgAl<sub>10</sub>O<sub>17</sub> for plant growth LED light**

*Yunpeng Zhou<sup>a</sup>, Takatoshi Seto\*<sup>a</sup>, Ziyong Kang<sup>a</sup>, Yuhua Wang\*<sup>a</sup>*

<sup>a</sup> National & Local Joint Engineering Laboratory for Optical Conversion Materials and  
Technology;

School of Physical Science and Technology, Lanzhou University, No. 222, South  
Tianshui Road, Lanzhou, Gansu, 730000, P. R. China;

E-mail: [wyh@lzu.edu.cn](mailto:wyh@lzu.edu.cn)

\* **Corresponding author:** Prof. Yuhua Wang & Prof. Takatoshi Seto

**E-mail:** [wyh@lzu.edu.cn](mailto:wyh@lzu.edu.cn)

This supporting information contains 5 pages, 5 figures, and 2 tables.

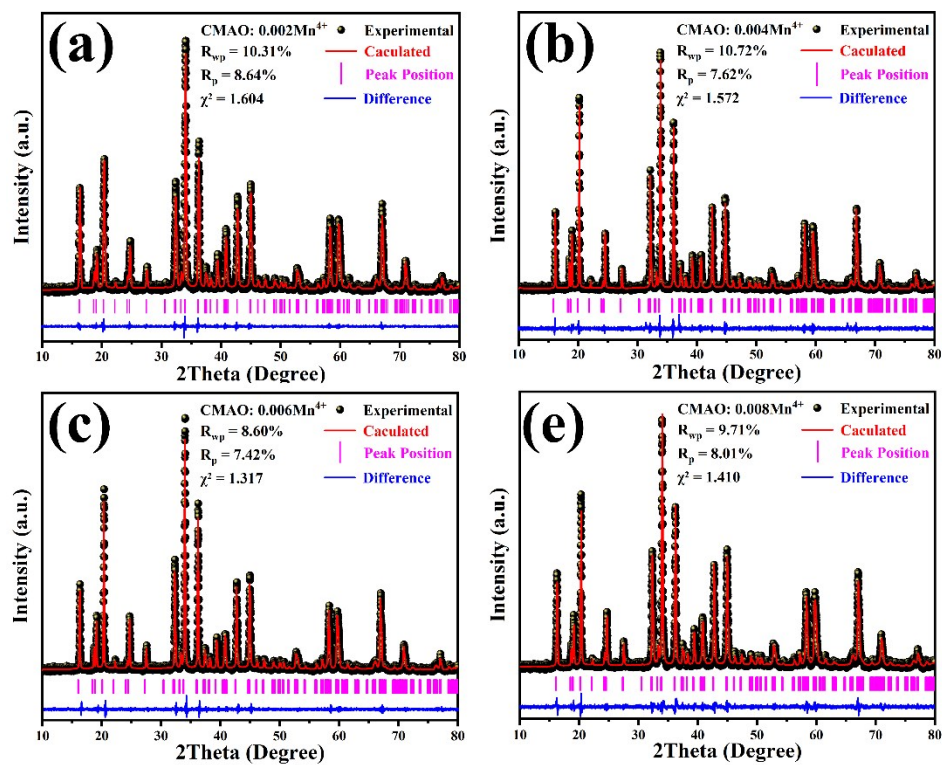

**Figure S1.** The XRD Rietveld refinement spectrum of a) CAMO: 0.002Mn<sup>4+</sup>, b) CAMO: 0.004Mn<sup>4+</sup>, c) CAMO: 0.006Mn<sup>4+</sup> and d) CAMO: 0.008Mn<sup>4+</sup>.

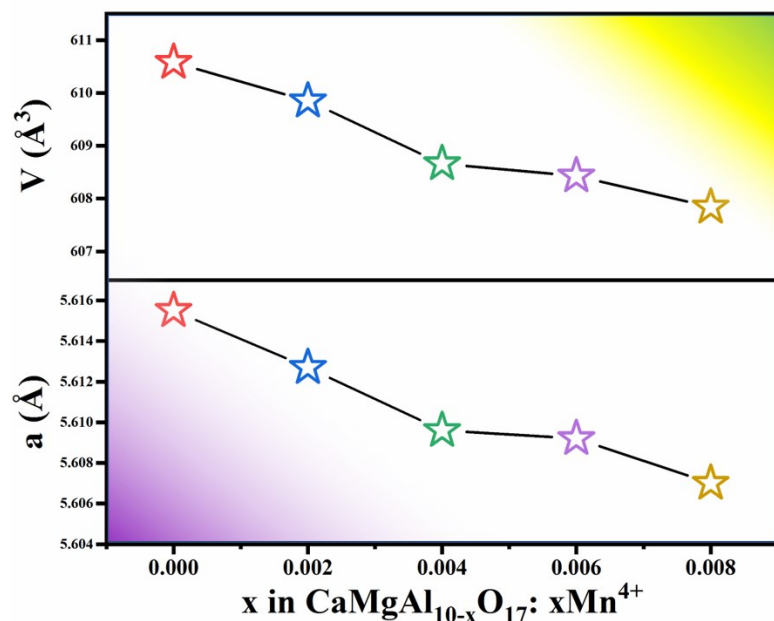

**Figure S2.** The dependence of lattice parameters and cell volumes of CaMgAl<sub>10-x</sub>O<sub>17</sub>: xMn<sup>4+</sup> on the nominal Mn<sup>4+</sup> content x.

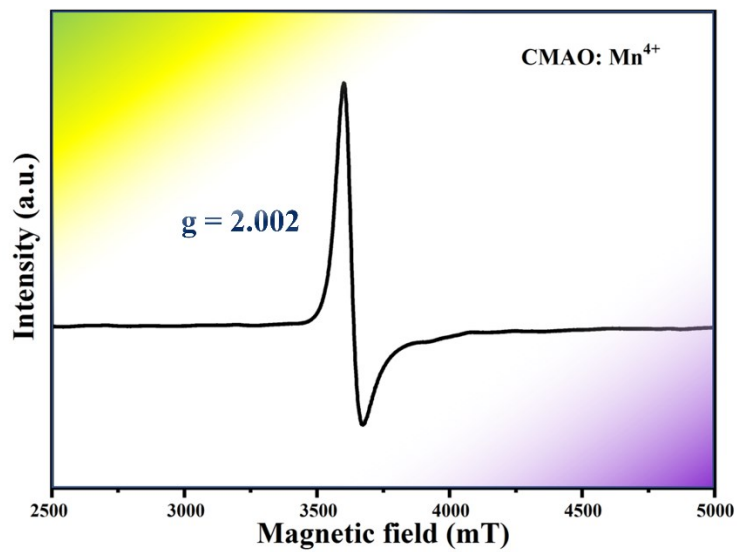

Figure S3. EPR spectrum of CMAO: Mn<sup>4+</sup>.

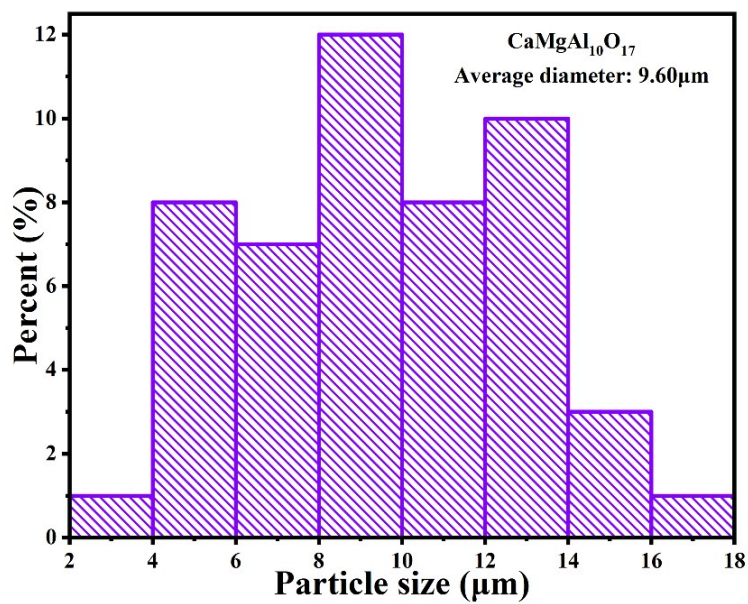

Figure S4. SEM particle size distribution.

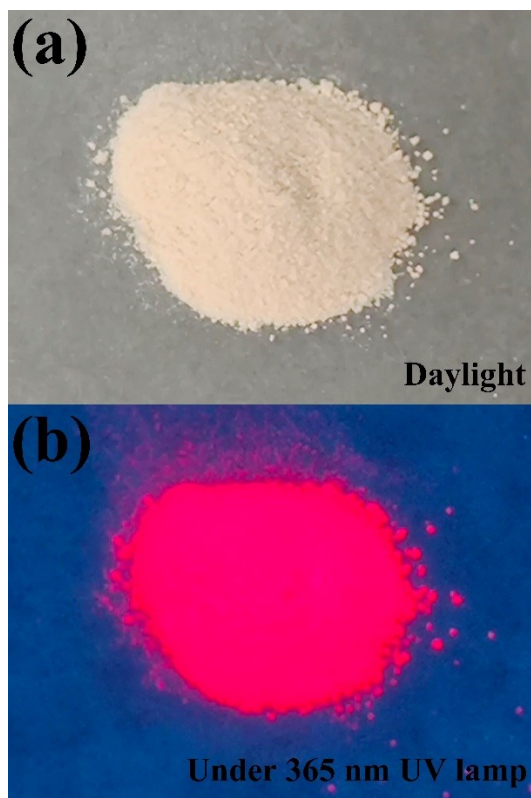

**Figure S5.** The pictures of CMAO: Mn<sup>4+</sup> phosphor a) in daylight and b) under 365 nm UV lamp.

**Table S1.** Crystallographic data for CaMgAl<sub>10</sub>O<sub>17</sub>

| Formula        | CaMgAl <sub>10</sub> O <sub>17</sub> |
|----------------|--------------------------------------|
| Crystal system | hexagonal                            |
| Space-group    | <i>P6<sub>3</sub>/mmc (194)</i>      |
| V              | 610.58(2) Å <sup>3</sup>             |
| a              | 5.6155(1) Å                          |
| b              | 5.6155(1) Å                          |
| c              | 22.3582(4) Å                         |
| Calc. density  | 3.98177 g/cm <sup>3</sup>            |

**Table S2.** Atomic coordinates for  $\text{CaMgAl}_{10}\text{O}_{17}$ 

| Atom | Wyckoff    | x/a         | y/b       | z/c         | U [ $\text{\AA}^2$ ] |
|------|------------|-------------|-----------|-------------|----------------------|
| Ca1  | <i>2d</i>  | 2/3         | 1/3       | 1/4         | 0.0447(7)            |
| Al1  | <i>12k</i> | 0.83337(23) | 0.6668(5) | 0.10632(7)  | 0.0513(6)            |
| Al2  | <i>4f</i>  | 1/3         | 2/3       | 0.02294(22) | 0.0580(21)           |
| Mg1  | <i>4f</i>  | 1/3         | 2/3       | 0.02308(28) | 0.0024(24)           |
| Al3  | <i>4f</i>  | 1/3         | 2/3       | 0.17450(15) | 0.0294(13)           |
| Al4  | <i>2a</i>  | 0           | 0         | 0           | 0.0218(18)           |
| O1   | <i>12k</i> | 0.15799(30) | 0.3160(6) | 0.04995(8)  | 0.0336(12)           |
| O2   | <i>12k</i> | 0.5023(4)   | 0.0047(7) | 0.14976(12) | 0.0036(12)           |
| O3   | <i>4f</i>  | 2/3         | 1/3       | 0.05871(20) | 0.0059(23)           |
| O4   | <i>4e</i>  | 0           | 0         | 0.14639(28) | 0.0075(25)           |
| O5   | <i>2c</i>  | 1/3         | 2/3       | 1/4         | 0.036(4)             |
